# Supplementary material for: Impaired immune surveillance accelerates accumulation of senescent cells and aging
Source: PubMed Central journal article supplement (PMC6303397; doi:10.1038/s41467-018-07825-3), 2018-12-21
Supplement: 41467_2018_7825_MOESM3_ESM.pdf [file 41467_2018_7825_MOESM3_ESM.pdf]

## **Description of Additional Supplementary Files**

File Name: Supplementary Data 1  
Description: Differential expression.

File Name: Supplementary Data 2  
Description: Scatterplot all genes.
